# Supplementary material for: Fe4[Fe(CN)6]3: a cathode material for sodium-ion batteries
Source: Royal Society of Chemistry journal article supplement (doi:10.1039/c4ra07531e), 2014-08-28
Supplement: c4ra07531e1.pdf [file c4ra07531e1.pdf]

## Electronic Supplementary Information

### **Fe<sub>4</sub>[Fe(CN)<sub>6</sub>]<sub>3</sub>: A Cathode Material For Sodium-Ion Batteries**

He Sun,<sup>a</sup> Haobo Sun,<sup>a</sup> Wei Wang,<sup>a</sup> Handong Jiao,<sup>a</sup> Shuqiang Jiao\*.<sup>a</sup>

<sup>a</sup>State Key Laboratory of Advanced Metallurgy, University of Science and Technology

Beijing, Xueyuan Road 30, Beijing 100083, P. R. China

\*Corresponding Author: Professor Shuqiang Jiao, Fax: (+86)-10-62334204, E-mail:

[sjiao@ustb.edu.cn](mailto:sjiao@ustb.edu.cn) (S. Jiao)

**Table S1.** The lattice parameters, unit cell volume, total energy and formation energy of the undoped and doped Prussian blue ( $\text{Fe}_8\text{C}_{24}\text{N}_{24}$  without defects).

| Sample                                                            | a(Å)  | b(Å)  | c(Å)  | $\alpha$ | $\beta$ | $\gamma$ | Volume (Å <sup>3</sup> ) | Total energy (eV) | Formation Energy(eV) |
|-------------------------------------------------------------------|-------|-------|-------|----------|---------|----------|--------------------------|-------------------|----------------------|
| $\text{Fe}_8\text{C}_{24}\text{N}_{24}$                           | 9.90  | 9.90  | 9.90  | 90.00    | 90.00   | 90.00    | 969.00                   | -17128.28         | 0.00                 |
| $\text{Fe}_8\text{C}_{24}\text{N}_{24}\text{-Na}$                 | 9.91  | 9.91  | 9.91  | 90.17    | 89.91   | 89.52    | 972.42                   | -18435.49         | -4.27                |
| $\text{Fe}_8\text{C}_{24}\text{N}_{24}\text{-Na}_2$               | 9.91  | 9.92  | 9.92  | 89.32    | 90.01   | 89.51    | 975.26                   | -19742.84         | -8.68                |
| $\text{Fe}_8\text{C}_{24}\text{N}_{24}\text{-Na}_4$               | 9.93  | 9.95  | 9.94  | 88.46    | 89.56   | 88.44    | 981.34                   | -22357.25         | -17.20               |
| $\text{Fe}_8\text{C}_{24}\text{N}_{24}\text{-Na}_8$               | 10.00 | 9.97  | 9.95  | 88.73    | 91.94   | 89.18    | 991.61                   | -27583.30         | -31.47               |
| $\text{Fe}_8\text{C}_{24}\text{N}_{24}\text{-Na}_{12}$            | 10.03 | 10.19 | 10.08 | 93.40    | 90.28   | 90.77    | 1027.38                  | -32796.31         | -32.71               |
| $\text{Fe}_8\text{C}_{24}\text{N}_{24}\text{-Na}_{16}$            | 12.48 | 9.76  | 9.78  | 95.05    | 78.01   | 86.88    | 1157.95                  | -38014.47         | -39.10               |
| $\text{Fe}_7\text{C}_{24}\text{N}_{24}\text{-Na(Fe}^{2+}\text{)}$ | 10.12 | 10.12 | 10.12 | 90.00    | 90.00   | 90.00    | 1037.81                  | -17555.53         | 10.81                |
| $\text{Fe}_7\text{C}_{24}\text{N}_{24}\text{-Na(Fe}^{3+}\text{)}$ | 10.09 | 10.09 | 10.09 | 90.00    | 90.00   | 90.00    | 1027.20                  | -17559.55         | 6.79                 |
| $\text{Fe}_8\text{C}_{24}\text{N}_{24}\text{-Fe}$                 | 9.84  | 9.84  | 9.84  | 89.94    | 90.01   | 90.03    | 953.17                   | -17989.27         | 3.89                 |

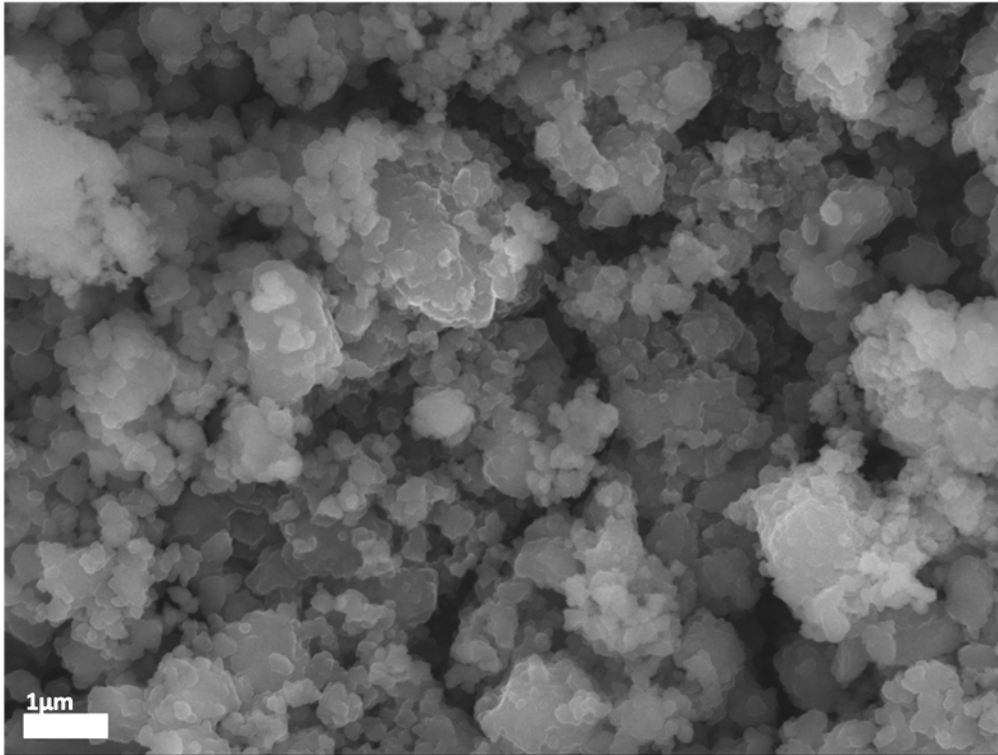

**Figure S1.** SEM of the as-synthesized  $\text{Fe}_4[\text{Fe}(\text{CN})_6]_3$ .

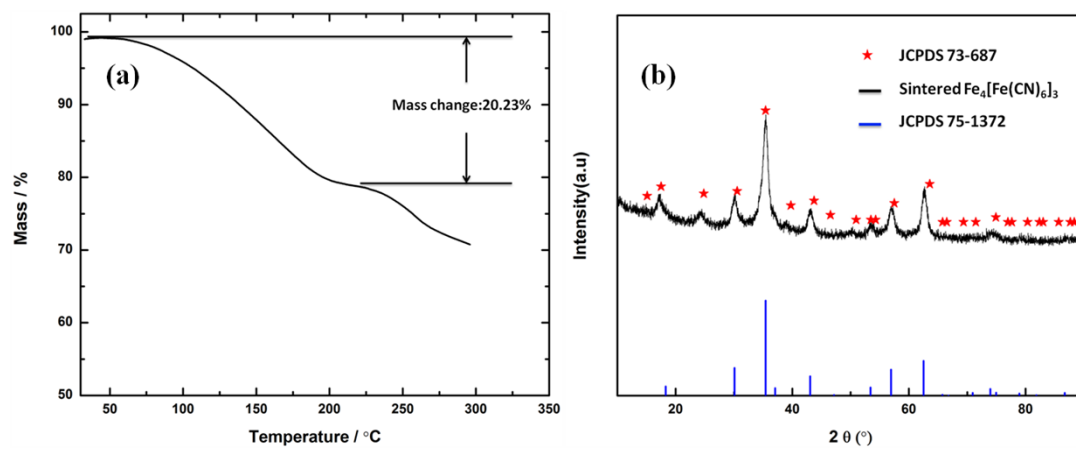

**Figure S2.** (a) TGA of as-synthesized  $\text{Fe}_4[\text{Fe}(\text{CN})_6]_3$  (b) XRD of the sintered  $\text{Fe}_4[\text{Fe}(\text{CN})_6]_3$ .

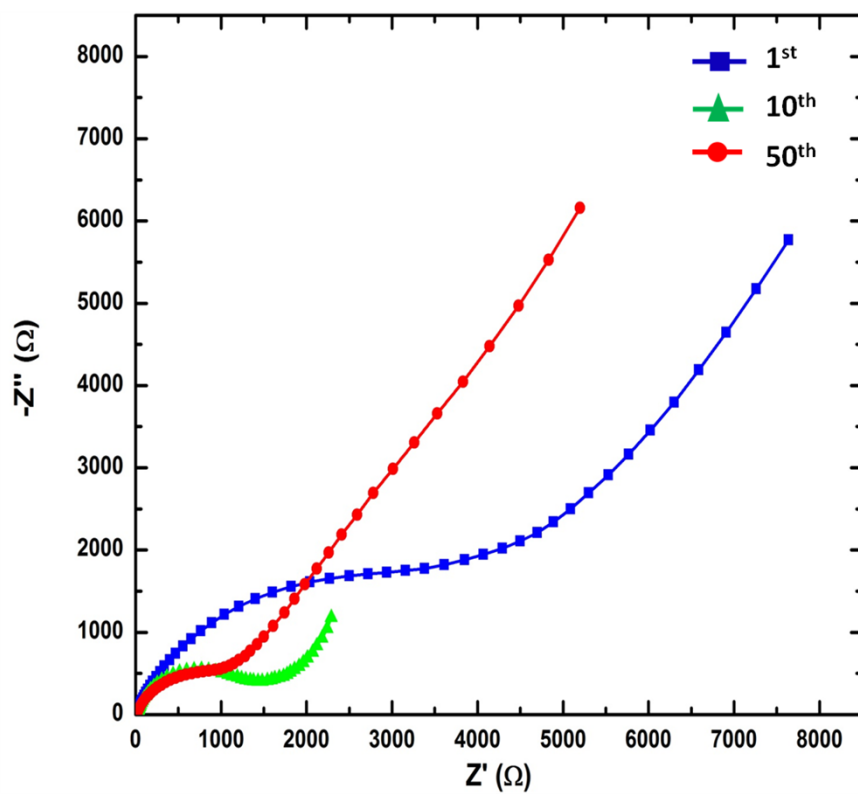

Figure S3. Impedance spectra for different cycles.
